# Supplementary material for: Relationships between greenhouse gas production and landscape position during short-term permafrost thaw under anaerobic conditions in the Lena Delta
Source: Copernicus journal article supplement (doi:10.5194/bg-20-2049-2023), 2023-06-06
Supplement: Supplementary file 1 [file bg-20-2049-2023-supplement.pdf]

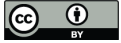

*Supplement of*

**Relationships between greenhouse gas production and landscape position during short-term permafrost thaw under anaerobic conditions in the Lena Delta**

**Mélissa Laurent et al.**

*Correspondence to:* Mélissa Laurent ([melissa.laurent@awi.de](mailto:melissa.laurent@awi.de))

The copyright of individual parts of the supplement might differ from the article licence.

a. Upland – P15

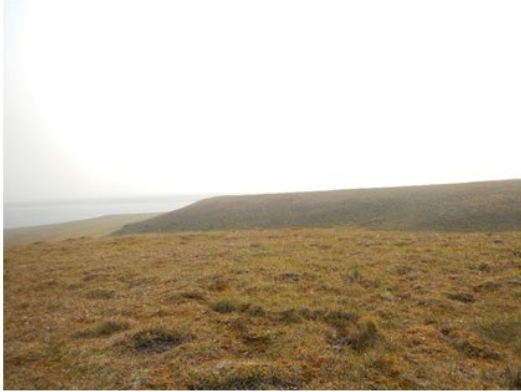

d.

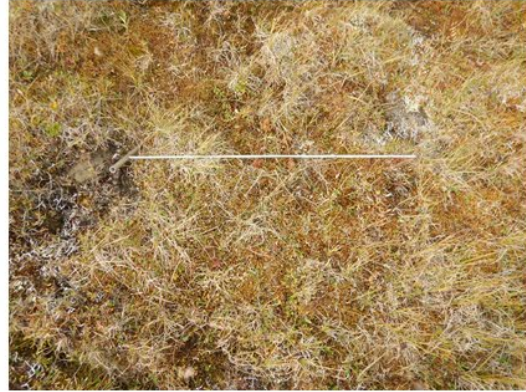

b. Slope – P16

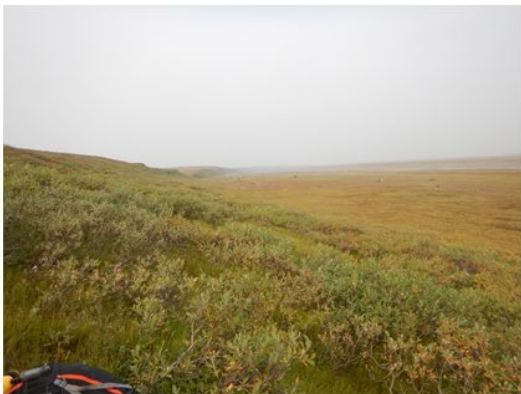

e.

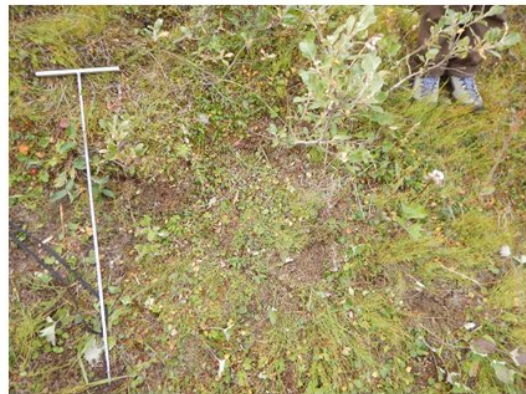

c. Floodplain – P17

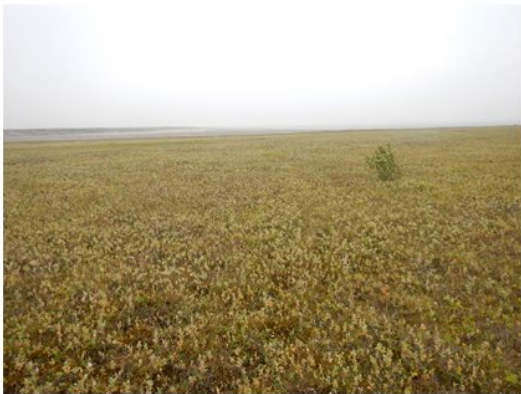

f.

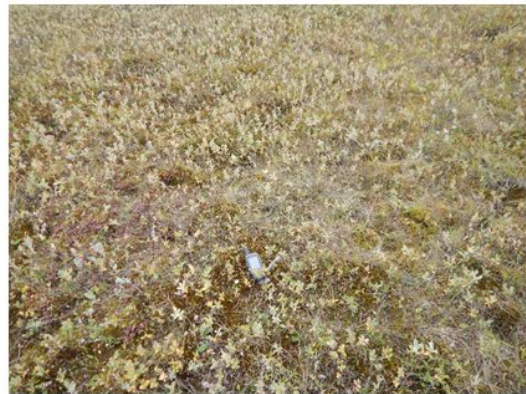

**Supplementary Figure 1: Pictures of the three sampling sites. The left column (a., b., c.) shows the site topography, and the right column (d., e., f.) shows the vegetation.**

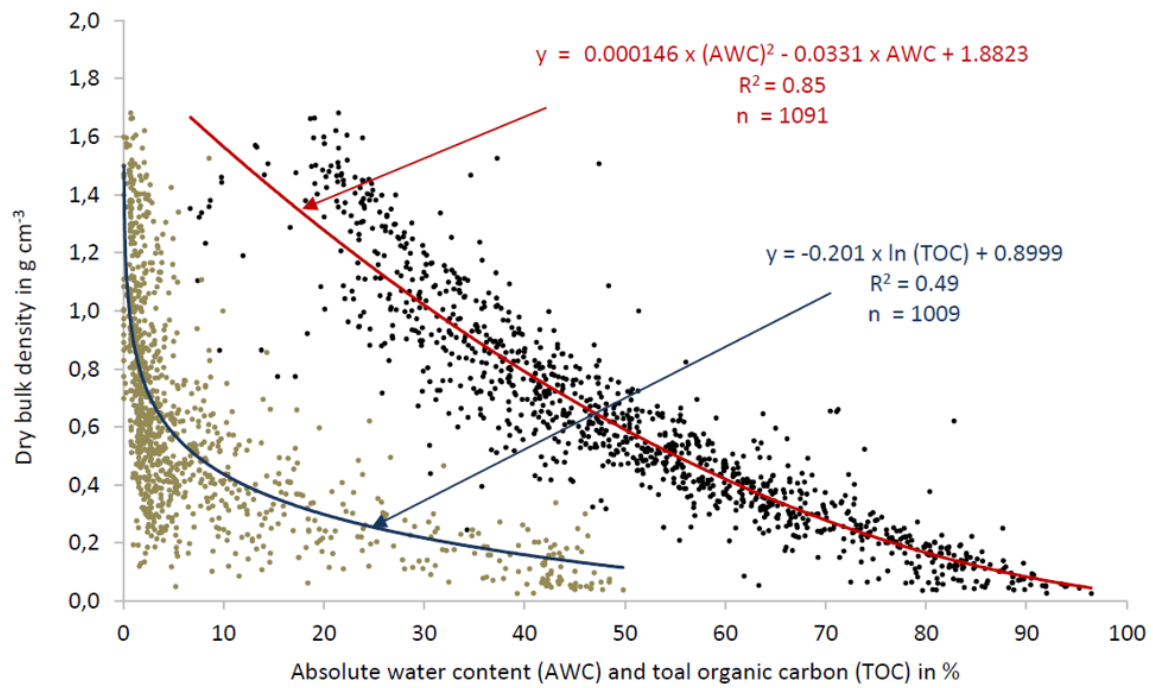

**Supplementary Figure 2: Relationship between absolute water content/total organic carbon and dry bulk density. Samples from Kurungnakh Island mostly were used to make these transfer functions. (Fuchs 2019).**

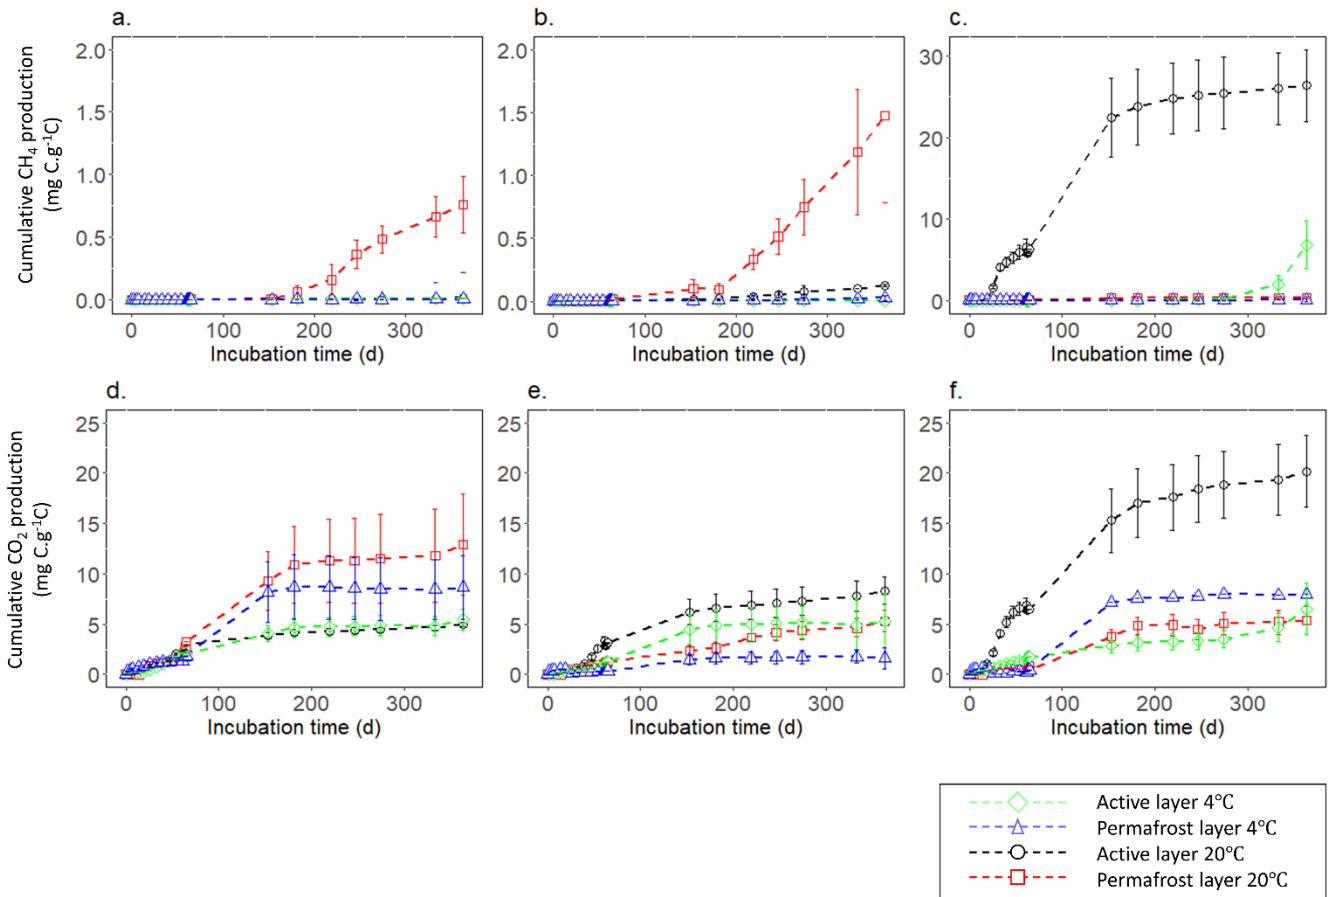

**Supplementary Figure 3: Cumulative gas production per gram C at 4 °C and 20 °C for 363 days of incubation. CH<sub>4</sub> production of (a.) P15, (b.) P16 and (c.) P17. CO<sub>2</sub> production of (d.) P15, (e.) P16 and (f.) P17. Error bars show the standard deviation from the means ± standard error (n=3). Note differing y-axis scales between cores for CH<sub>4</sub>**

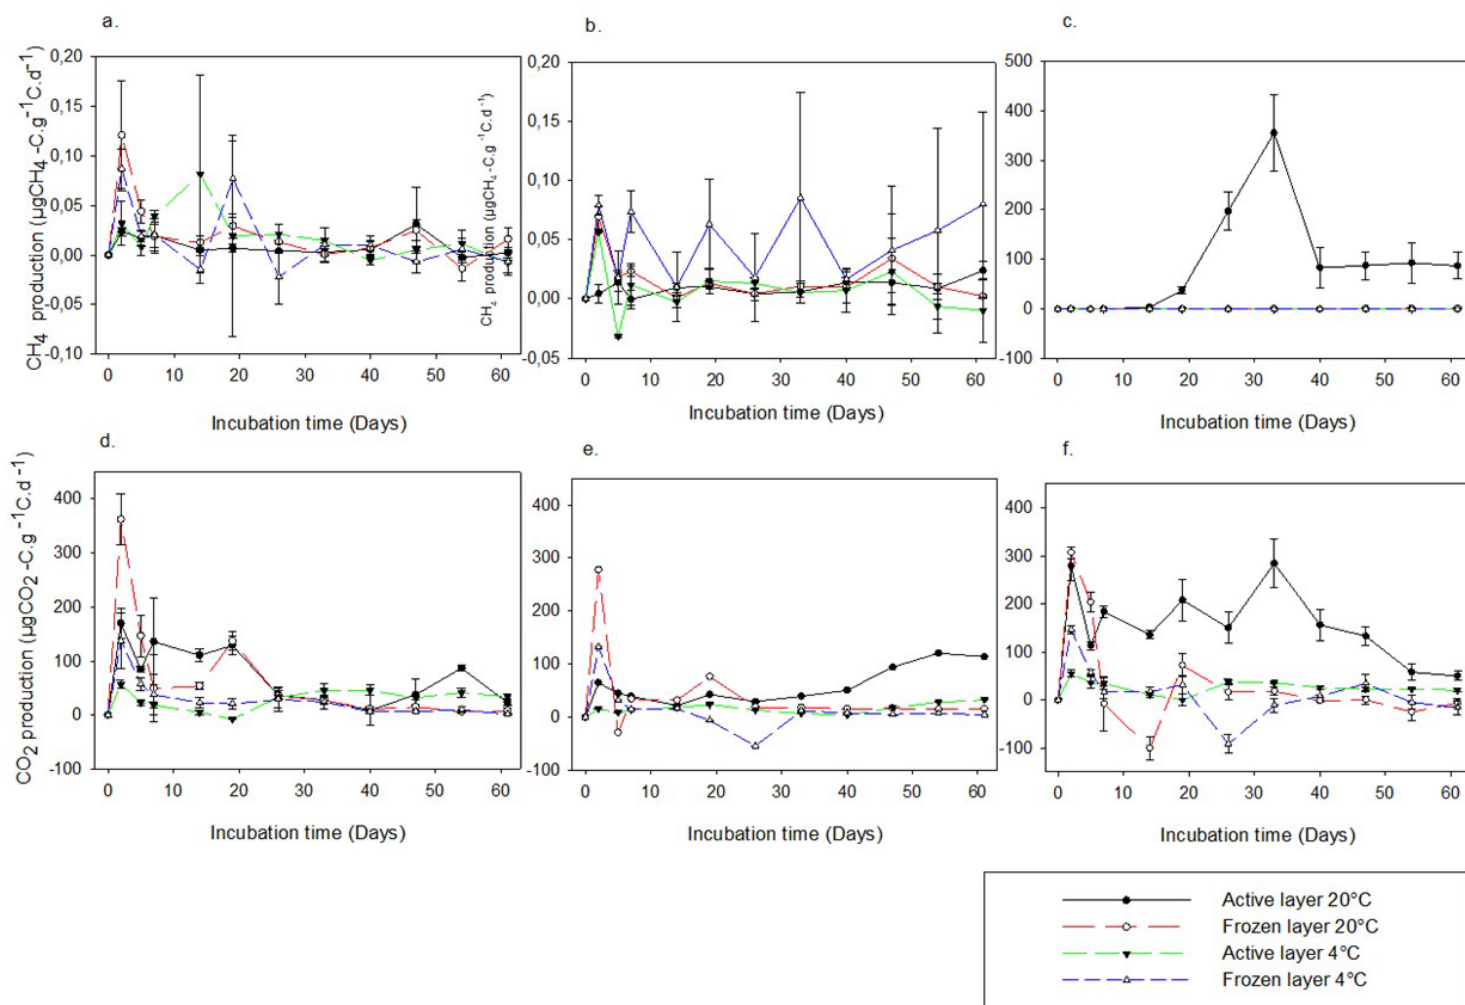

**Supplementary Figure 4: Gas production at 4 °C and 20 °C for 60 days of incubation. CH<sub>4</sub> production of (a.) P15. (b.) P16 and (c.) P17. CO<sub>2</sub> production of (d.) P15. (e.) P16 and (f.) P17. Error bars show the deviation from the means  $\pm$  standard error (n=3). Note differing y-axis scales between cores.**

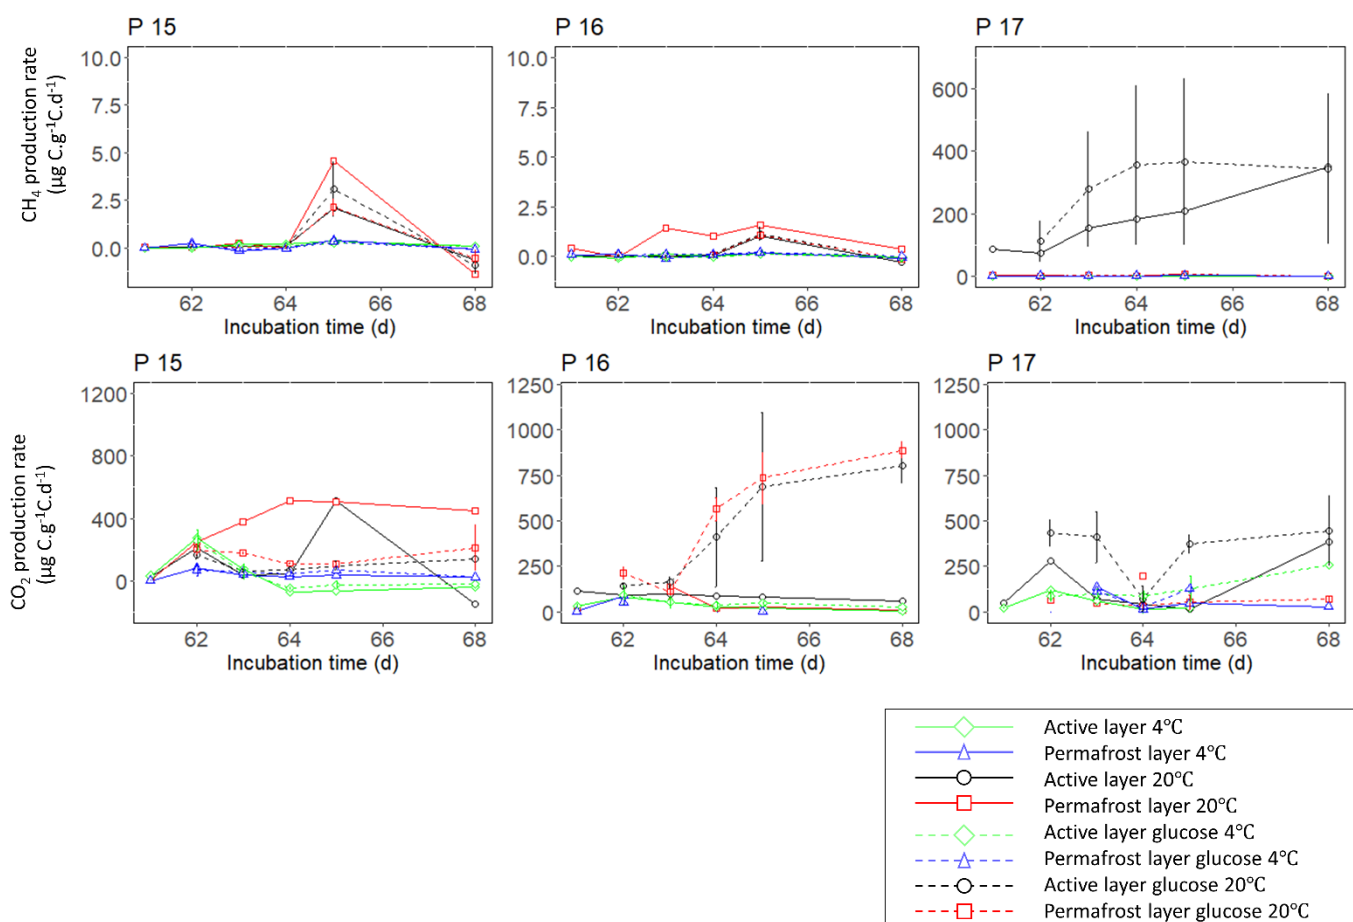

**Supplementary Figure 5: Gas production after glucose injection at 4 °C and 20 °C between 61 and 67 days of incubation. The glucose injections were carried out on days 61 and 64. CH<sub>4</sub> production of (a.) P15, (b.) P16, and (c.) P17 and CO<sub>2</sub> production of (d.) P15, (e.) P16, and (f.) P17. Error bars show the deviation from the mean  $\pm$  standard error (n=3). Note differing scales between cores.**

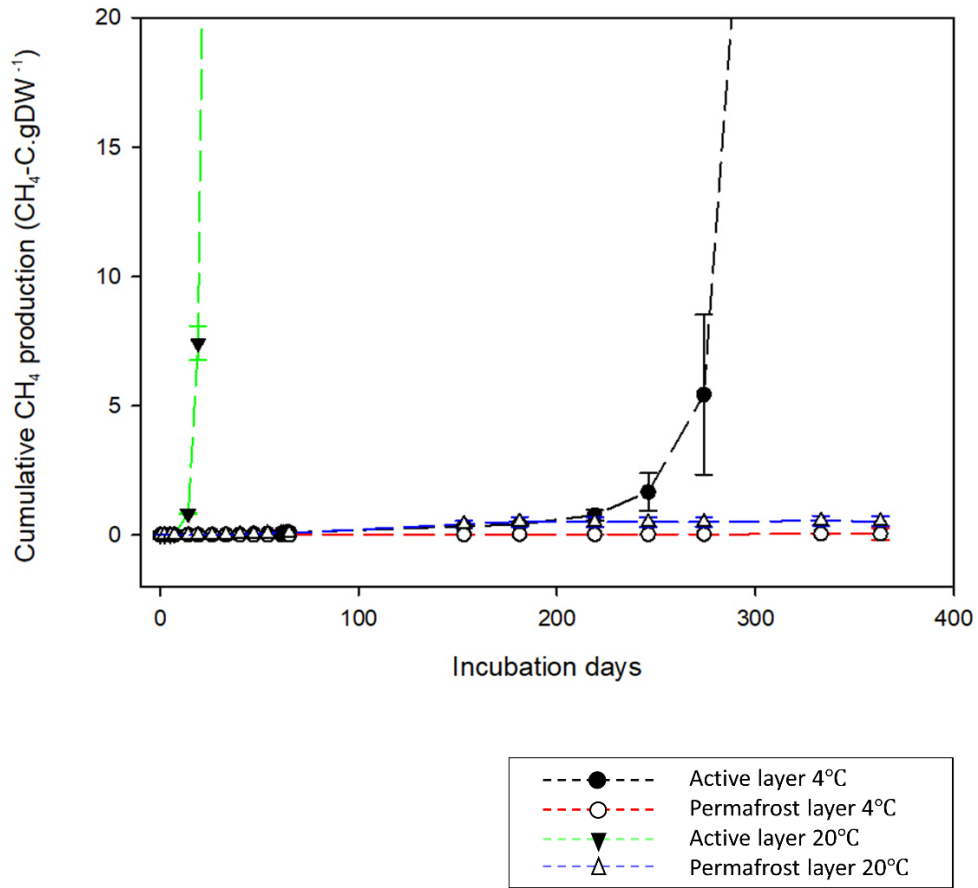

Supplementary Figure 6: Zoom-in to the cumulative CH<sub>4</sub> production of the active floodplain P17.

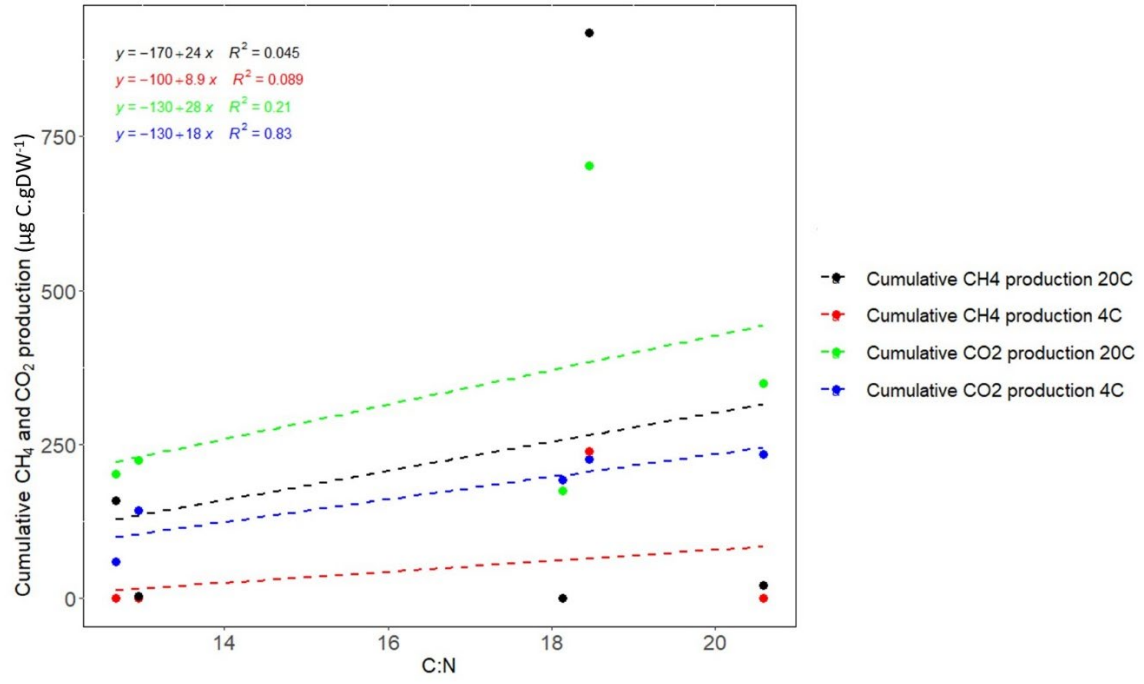

Supplementary Figure 7: Linear regression between C:N and the cumulative CH<sub>4</sub> and CO<sub>2</sub> production per gDW at 4 °C and 20 °C



**Supplementary Table 1: Grain size analysis of the samples and vegetation description**

| <i>Samples</i> | <i>Sand (%)</i> | <i>Silt (%)</i> | <i>Clay (%)</i> | <i>Vegetation</i>                                                                                                                                                            |
|----------------|-----------------|-----------------|-----------------|------------------------------------------------------------------------------------------------------------------------------------------------------------------------------|
| <i>P15-A</i>   | 31.42           | 50.33           | 18.22           | 40% moss. 40% sedges. 5% lichen. 5% cassiope. 5% grass. 3% salix. 2% forbs                                                                                                   |
| <i>P15-F</i>   | 28.75           | 53.45           | 17.81           |                                                                                                                                                                              |
| <i>P16-A</i>   | 30.09           | 50.8            | 19.13           | Salix. equisetum. dwarf birch. almost no sedges. moss. Salix have a height of approx. 70 cm. On the plot itself no taller shrubs present. 65% Salix. 30% Equisetum. 5% Moss. |
| <i>P16-F</i>   | 26.73           | 55.12           | 18.07           |                                                                                                                                                                              |
| <i>P17-A</i>   | 18.89           | 45.40           | 35.72           | Salix and moss were dominating with some sedges and equisetum. Height of salix shrubs: 10 cm. moss covered the surface.                                                      |
| <i>P17-F</i>   | 96.26           | 3.1             | 0.48            |                                                                                                                                                                              |

**Supplementary Table 2: Cumulative production of CO<sub>2</sub> and CH<sub>4</sub> per gramC and gram DW. Maximum production rate of CO<sub>2</sub> and CH<sub>4</sub> per gram C.**

| <i>Samples</i>  | <i>Cumulative CO<sub>2</sub> production (μg CO<sub>2</sub>-C .g DW<sup>-1</sup>)</i> | <i>Cumulative CO<sub>2</sub> production (mg CO<sub>2</sub>-C .g C<sup>-1</sup>)</i> | <i>Max production rate CO<sub>2</sub> (μg C-CO<sub>2</sub>.g C<sup>-1</sup>.d<sup>-1</sup>)</i> | <i>Cumulative CH<sub>4</sub> production (μg CH<sub>4</sub>-C .g DW<sup>-1</sup>)</i> | <i>Cumulative CH<sub>4</sub> production (mg CH<sub>4</sub>-C .g C<sup>-1</sup>)</i> | <i>Max production rate CH<sub>4</sub> (μg C-CH<sub>4</sub>.g C<sup>-1</sup>.d<sup>-1</sup>)</i> |
|-----------------|--------------------------------------------------------------------------------------|-------------------------------------------------------------------------------------|-------------------------------------------------------------------------------------------------|--------------------------------------------------------------------------------------|-------------------------------------------------------------------------------------|-------------------------------------------------------------------------------------------------|
| <i>P15-A-4</i>  | 192.15 ±38.23                                                                        | 5.42 ±1.08                                                                          | 75.54 ± 7.9                                                                                     | 0.41 ± 0.15                                                                          | 0.01 ± 0.004                                                                        | 0.37                                                                                            |
| <i>P15-F-4</i>  | 234.00 ±85.85                                                                        | 8.66 ± 3.18                                                                         | 137.34 ± 51.40                                                                                  | 0.14 ± 5.90                                                                          | 0.005 ± 0.02                                                                        | 1.90 ± 3.24                                                                                     |
| <i>P16-A-4</i>  | 142.04 ±70.86                                                                        | 5.26 ± 2.62                                                                         | 57.13                                                                                           | 0.09 ± 0.02                                                                          | 0.003 ± 0.001                                                                       | 0.18                                                                                            |
| <i>P16-F-4</i>  | 59.93 ± 40.49                                                                        | 1.57 ± 1.06                                                                         | 132.45 ± 19.86                                                                                  | 0.93 ± 0.87                                                                          | 0.02 ± 0.02                                                                         | 0.18                                                                                            |
| <i>P17-A-4</i>  | 226.43 ± 88.71                                                                       | 6.51 ± 2.55                                                                         | 62.51 ± 74.30                                                                                   | 238.06 ± 103.26                                                                      | 6.84 ± 2.97                                                                         | 96.28 ±109.37                                                                                   |
| <i>P17-F-4</i>  | 26.66 ± 10.06                                                                        | 7.98                                                                                | 754 ± 590                                                                                       | 0.05 ± 0.23                                                                          | 0.03 ± 0.13                                                                         | 4.46                                                                                            |
| <i>P15-A-20</i> | 175.05 ± 7.10                                                                        | 4.94 ± 0.20                                                                         | 510.65                                                                                          | 0.51 ± 0.14                                                                          | 0.01 ± 0.003                                                                        | 2.08                                                                                            |
| <i>P15-F-20</i> | 348.34 ± 134.91                                                                      | 12.89 ± 4.99                                                                        | 510.48                                                                                          | 20.52 ± 6.11                                                                         | 0.76 ± 0.23                                                                         | 4.59                                                                                            |
| <i>P16-A-20</i> | 224.72 ± 37.11                                                                       | 8.32 ± 1.37                                                                         | 120.54 ± 40.04                                                                                  | 3.34 ± 0.26                                                                          | 0.12 ± 0.01                                                                         | 7.35 ± 11.48                                                                                    |
| <i>P16-F-20</i> | 201.52 ± 40.82                                                                       | 5.29 ± 1.07                                                                         | 277.84 ± 32.65                                                                                  | 159.03 ± 154.91                                                                      | 1.48 ± 0.69                                                                         | 63.36 ±98.9                                                                                     |
| <i>P17-A-20</i> | 701.43 ± 124.65                                                                      | 20.17 ± 3.58                                                                        | 382.78                                                                                          | 917.18 ± 103.88                                                                      | 26.37 ± 4.45                                                                        | 355.52 ±77.17                                                                                   |
| <i>P17-F-20</i> | 9.04 ± 2.33                                                                          | 5.35 ± 1.38                                                                         | 331.80 ± 274.53                                                                                 | 0.52 ± 0.19                                                                          | 0.31 ± 0.11                                                                         | 5.94                                                                                            |

**Supplementary Table 3: Comparison of floodplain total CH<sub>4</sub> emissions between our study (P17) and incubation results of Herbst (2022) (P19, P24 and P25). Samples were incubated at 20°C for 61 days (P17) and 68 days (P19, P24, P25).**

| <i>Samples</i>                                                                                                 | <i>P17</i>         | <i>P19</i>     | <i>P24</i>   | <i>P25</i>  |
|----------------------------------------------------------------------------------------------------------------|--------------------|----------------|--------------|-------------|
| <i>Mean Total CH<sub>4</sub> productions (μg CH<sub>4</sub>-C .gC<sup>-1</sup>)<br/>(n = 3) [Active layer]</i> | 6539.022 ± 1299.21 | 149.23 ± 35.79 | 38.15 ± 2.88 | 0.62 ± 0.69 |
| <i>Mean Total CH<sub>4</sub> productions (μg CH<sub>4</sub>-C .gC<sup>-1</sup>)<br/>(n = 3) [Frozen layer]</i> | 42.533 ± 15.79     | 72.39 ± 15.17  | 34.66 ± 5.17 | 0.16 ± 0.07 |

**Supplementary Table 4: Characteristics of the samples for qPCR analysis. (\*) indicates that DNA concentration is very low, explaining the absence of results for qPCR. (\*\*) DNA concentration is below detection threshold.**

| <i>Sample</i>        | <i>Weight (g)</i> | <i>Weight (g)</i> | <i>DNA concentration (ng/μL)</i> |
|----------------------|-------------------|-------------------|----------------------------------|
| <i>A-P15-A*</i>      | 0.228             |                   | 0.09                             |
| <i>A-P15-F**</i>     | 0.293             | 0.276             |                                  |
| <i>A-P16-A</i>       | 0.189             |                   | 1.01                             |
| <i>A-P16-F</i>       | 0.221             |                   | 1.08                             |
| <i>A-P17-A</i>       | 0.232             |                   | 3.39                             |
| <i>A-P17-F**</i>     | 0.26              | 0.248             |                                  |
| <i>C-P15-A.1.20</i>  | 0.255             |                   | 0.186                            |
| <i>C-P15-F.1.20*</i> | 0.229             |                   | 0.057                            |
| <i>C-P16-A.1.20</i>  | 0.217             |                   | 0.578                            |
| <i>C-P16-F.1.20</i>  | 0.233             |                   | 1.95                             |
| <i>C-P17-A.1.20</i>  | 0.248             |                   | 1.79                             |
| <i>C-P17-F.1.20*</i> | 0.246             |                   | 0.089                            |
| <i>C-P15-A.1.4</i>   | 0.227             |                   | 0.71                             |
| <i>C-P15-F.1.4**</i> | 0.231             | 0.227             |                                  |
| <i>C-P16-A.1.4</i>   | 0.228             |                   | 1.22                             |
| <i>C-P16-F.1.4</i>   | 0.244             |                   | 0.229                            |
| <i>C-P17-A.1.4</i>   | 0.22              |                   | 4.94                             |
| <i>C-P17-F.1.4*</i>  | 0.22              |                   | 0.069                            |
| <i>D-P16-A.1.20</i>  | 0.223             |                   | 0.997                            |
| <i>D-P17-A.1.20</i>  | 0.271             |                   | 1.6                              |
| <i>D-P16-A.1.4</i>   | 0.26              |                   | 1.47                             |
| <i>D-P17-A.1.4</i>   | 0.249             |                   | 5.54                             |
| <i>G-P16-A.2.20</i>  | 0.25              |                   | 0.998                            |
| <i>G-P17-A.2.20</i>  | 0.261             |                   | 2.63                             |
| <i>G-P16-A.2.4</i>   | 0.249             |                   | 0.636                            |
| <i>G-P17-A.2.4</i>   | 0.264             |                   | 5.53                             |
